# Supplementary material for: Psychological Impact and Women’s Evaluation of the First-Trimester Pre-Eclampsia Screening and Prevention: ASPRE Trial
Source: MDPI journal article supplement (doi:10.3390/ijerph20075418), 2023-04-06
Supplement: s1 [file s1]

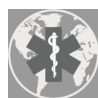

## Supplementary Materials:

Sample of N = 225 first-trimester pregnant women prospectively and longitudinally assesses across the three assessment points.

Table S1. Group differences in baseline socio-demographic characteristics (N=225)

|                                        | Low-risk<br>( <i>n</i> = 197) | High risk<br>( <i>n</i> = 28) | <i>P</i> values |
|----------------------------------------|-------------------------------|-------------------------------|-----------------|
| Maternal age (years)                   | 33.09 (4.35)                  | 32.46 (4.57)                  | ns              |
| Maternal education                     |                               |                               |                 |
| O levels                               | -                             | 1                             | ns              |
| A levels                               | 14                            | 2                             |                 |
| Graduate degree                        | 36                            | 6                             |                 |
| Pg degree                              | 93                            | 11                            |                 |
|                                        | 53                            | 7                             |                 |
| Maternal employment                    |                               |                               |                 |
| employed                               | 170                           | 25                            | ns              |
| unemployed/homemaker/<br>student/other | 3                             | -                             |                 |
|                                        | 24                            | 3                             |                 |
| Relationship status                    |                               |                               |                 |
| married or living with partner         | 190                           | 23                            | 0.007           |
| single, separated, divorced, other     | 7                             | 5                             |                 |
| Emotional difficulties (no)            | 143                           | 24                            | ns              |
| Parity (no)                            | 98                            | 7                             | 0.034           |
| Conception (natural)                   | 189                           | 25                            | ns              |

Note. Data are given as No. (%), mean (SD)

P-values are calculated using Student's t-test, Pearson's chi-square test

PE = preeclampsia

ns = not significant

Table S2. Group differences in mental-health indexes across the three assessment points.

|                     | <b>1<sup>st</sup> trimester</b> |                     |                 |                             |
|---------------------|---------------------------------|---------------------|-----------------|-----------------------------|
|                     | Low risk<br>(n = 197)           | High risk<br>(n=28) | <i>P</i> values | Adjusted<br><i>P</i> values |
| SF- physical health | 74.36 (1.99)                    | 75.13 (1.39)        | <b>0.015</b>    | 0.064                       |
| SF- mental health   | 82.64 (3.18)                    | 83.45 (3.29)        | 0.228           | 0.337                       |
| Anxiety             | 32.34 (11.18)                   | 31.55 (10.32)       | 0.711           | 0.469                       |
| Depression          | 4.32 (3.83)                     | 4.13 (4.41)         | 0.914           | 0.635                       |
| Worry               | 8.71 (4.61)                     | 8.32 (4.56)         | 0.676           | 0.429                       |

Note. Data are given as mean (SD); P-values are calculated using Student's t-test

P values adjusted for: maternal age, education, employment, parity, relationship status and previous emotional difficulties

|                     | <b>2<sup>nd</sup> trimester</b> |                      |                 |                             |
|---------------------|---------------------------------|----------------------|-----------------|-----------------------------|
|                     | Low risk<br>(n = 155)           | High risk<br>(n= 25) | <i>P</i> values | Adjusted<br><i>P</i> values |
| SF- physical health | 72.82 (2.56)                    | 73.35 (2.19)         | 0.289           | 0.421                       |
| SF- mental health   | 82.89 (3.36)                    | 83.11 (3.56)         | 0.784           | 0.713                       |
| Anxiety             | 33.12 (11.78)                   | 33.61 (13.15)        | 0.864           | 0.402                       |
| Depression          | 4.88 (4.03)                     | 6.00 (6.17)          | 0.389           | 0.051                       |
| Worry               | 8.57 (4.06)                     | 6.96 (4.00)          | 0.072           | 0.036                       |

Note. Data are given as mean (SD); P-values are calculated using Student's t-test

P values adjusted for: maternal age, education, employment, parity, relationship status and previous emotional difficulties

|                     | <b>3<sup>rd</sup> trimester</b> |                       |                 |                             |
|---------------------|---------------------------------|-----------------------|-----------------|-----------------------------|
|                     | Low risk<br>(n = 87)            | High risk<br>(n = 20) | <i>P</i> values | Adjusted<br><i>P</i> values |
| SF- physical health | 72.24 (3.09)                    | 73.57 (2.19)          | <b>0.037</b>    | 0.059                       |
| SF- mental health   | 82.71 (3.95)                    | 83.17 (3.61)          | 0.642           | 0.560                       |
| Anxiety             | 34.75 (13.96)                   | 29.74 (10.02)         | 0.062           | 0.967                       |
| Depression          | 5.57 (5.94)                     | 5.05 (5.47)           | 0.709           | 0.582                       |
| Worry               | 7.51 (4.47)                     | 6.65 (3.6)            | 0.369           | 0.037                       |

Note. Data are given as mean (SD); P-values are calculated using Student's t-test

P values adjusted for: maternal age, education, employment, parity, relationship status and previous emotional difficulties

Table S3. Group differences in well-being and self-care indexes across pregnancy's timepoints

|                    | 2 <sup>nd</sup> trimester |                      |                 |                             |
|--------------------|---------------------------|----------------------|-----------------|-----------------------------|
|                    | Low risk<br>(n = 155)     | High risk<br>(n= 25) | <i>P</i> values | Adjusted<br><i>P</i> values |
| Life-style changes | 7.71 (7.45)               | 12.13 (6.74)         | < 0.001         | 0.023                       |

Note. Data are given as mean (SD); P-values are calculated using Student's t-test

P values adjusted for: maternal age, education, employment, parity, relationship status and previous emotional difficulties

|                    | 3 <sup>rd</sup> trimester |                      |                 |                             |
|--------------------|---------------------------|----------------------|-----------------|-----------------------------|
|                    | Low risk<br>(n = 87)      | High risk<br>(n= 20) | <i>P</i> values | Adjusted<br><i>P</i> values |
| Life-style changes | 5.97 (6.44)               | 10.05 (8.44)         | 0.059           | 0.143                       |

Note. Data are given as mean (SD); P-values are calculated using Student's t-test

P values adjusted for: maternal age, education, employment, parity, relationship status and previous emotional difficulties

### Supplement Moderation analysis

Figure S1. Simple slope analysis for Risk group × Depression interaction at time 3 on Life-Style Behaviours.

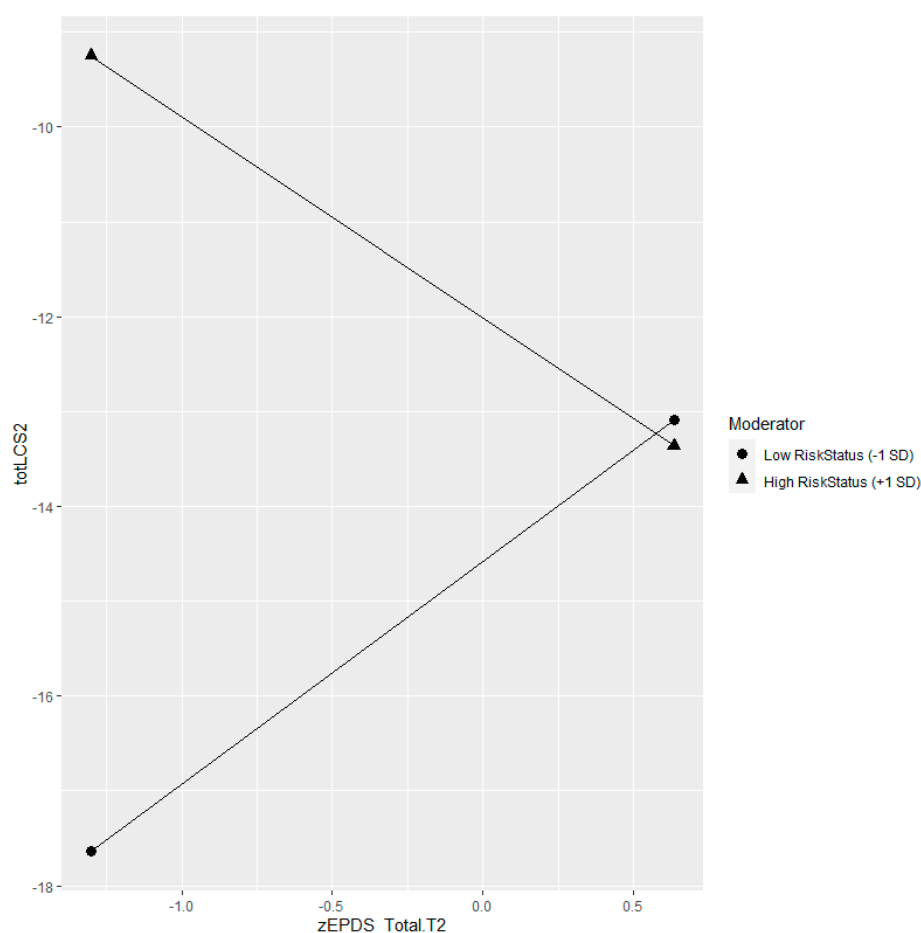

Table S4. Simple effects of Risk group: parameter estimates.

|           | Estimate  | SE         | t          | p     |
|-----------|-----------|------------|------------|-------|
| Low Risk  | 1.982436  | 2.007804   | 0.9873656  | 0.329 |
| High Risk | -2.503026 | 1.420016 - | -1.7626743 | 0.085 |
